# Supplementary material for: Energy level-modulated non-fullerene small molecule acceptors for improved VOC and efficiency of inverted perovskite solar cells
Source: Royal Society of Chemistry journal article supplement (doi:10.1039/c8ta12028e), 2019-01-01
Supplement: c8ta12028e1.pdf [file c8ta12028e1.pdf]

## Supporting Information

### Energy Level-Modulated Non-Fullerene Small Molecule Acceptors for Improved $V_{OC}$ and Efficiency of Inverted Perovskite Solar Cells

Xiaohui Liu,<sup>a,b</sup> Xiaodong Li,<sup>c</sup> Yang Zou,<sup>a</sup> He Liu,<sup>a</sup> Lei Wang,<sup>a</sup> Junfeng Fang,<sup>\*,c</sup> and Chuluo Yang<sup>\*,a,d</sup>

<sup>a</sup>Shenzhen Key Laboratory of Polymer Science and Technology, College of Materials Science and Engineering, Shenzhen University, Shenzhen 518060, China.

E-mail: clyang@whu.edu.cn

<sup>b</sup>Key Laboratory of Optoelectronic Devices and Systems of Ministry of Education and Guangdong Province, College of Optoelectronic Engineering, Shenzhen University, Shenzhen 518060, China.

<sup>c</sup>Ningbo Institute of Materials Technology and Engineering, Chinese Academy of Sciences Ningbo 315201, China.

<sup>d</sup>Hubei Key Lab on Organic and Polymeric Optoelectronic Materials, Department of Chemistry, Wuhan University, Wuhan 430072, China.

Corresponding Authors

\* E-mail: fangjf@nimte.ac.cn; clyang@whu.edu.cn

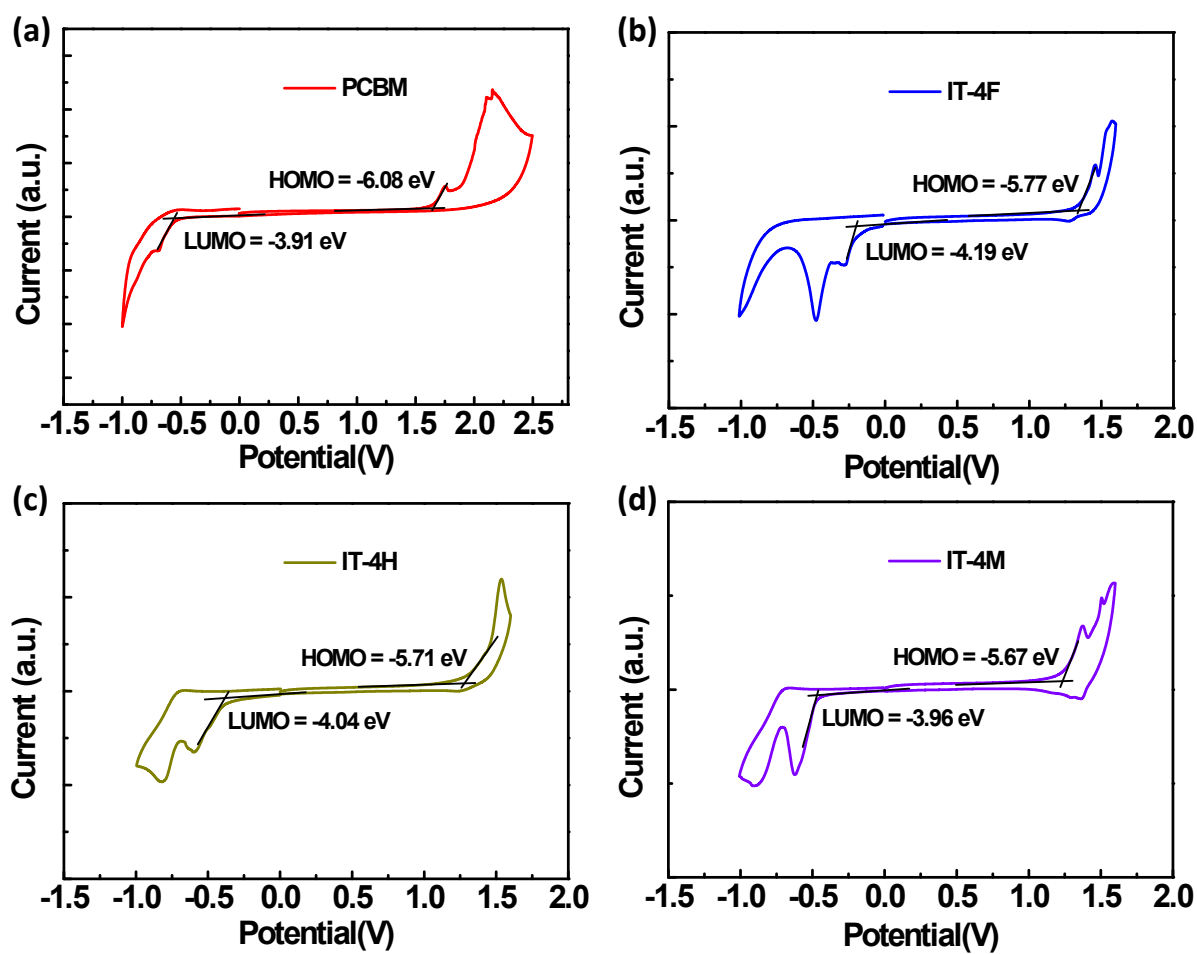

**Fig. S1** Cyclic voltammetry of PCBM, IT-4F, IT-4H and IT-4M in the film measured in a 0.1 M  $\text{Bu}_4\text{NPF}_6\text{-CH}_3\text{CN}$  solutions.

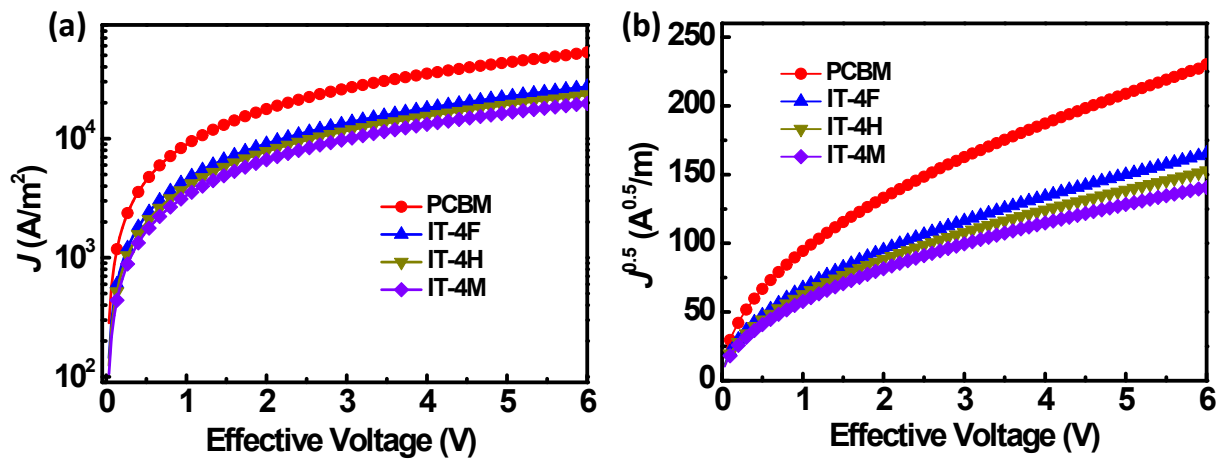

**Fig. S2** (a) Dark  $J$ - $V$  curves and (b)  $J^{0.5}$ - $V$  characteristics of the electron-only devices based on various ETLs (IT-4F, IT-4H, IT-4M and PCBM) with ITO/ZnO/IT-4X or PCBM/ZnO/Al structure.

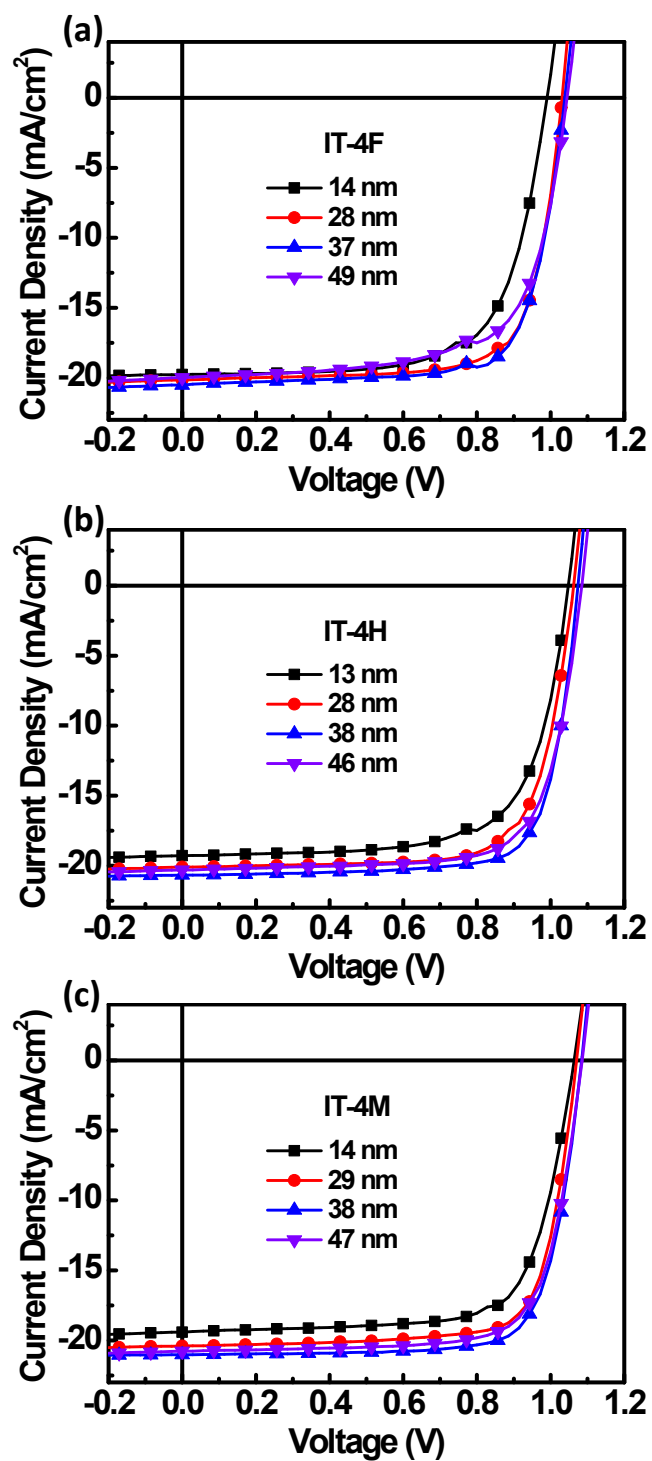

**Fig. S3** *J-V* curves of PVSCs based on various ETLs (IT-4F, IT-4H and IT-4M) in different thicknesses.

**Table S1.** Summary of the photovoltaic performances of PVSCs based on various ETLs (IT-4F, IT-4H and IT-4M) in different thicknesses.

| ETL   | Thickness (nm) | $V_{oc}$ (V) | $J_{sc}$ (mA/cm <sup>2</sup> ) | FF (%) | PCE (%) |
|-------|----------------|--------------|--------------------------------|--------|---------|
| IT-4F | 14             | 0.989        | 19.77                          | 69.39  | 13.56   |
|       | 28             | 1.029        | 20.15                          | 74.46  | 15.44   |
|       | 37             | 1.037        | 20.49                          | 75.03  | 15.94   |
|       | 49             | 1.043        | 19.99                          | 68.66  | 14.31   |
| IT-4H | 13             | 1.046        | 19.29                          | 70.22  | 14.17   |
|       | 28             | 1.061        | 20.12                          | 73.17  | 15.61   |
|       | 38             | 1.072        | 20.68                          | 76.83  | 17.04   |
|       | 46             | 1.083        | 20.31                          | 73.64  | 16.20   |
| IT-4M | 14             | 1.063        | 19.40                          | 72.73  | 14.99   |
|       | 29             | 1.069        | 20.40                          | 76.23  | 16.62   |
|       | 38             | 1.083        | 21.19                          | 76.86  | 17.65   |
|       | 47             | 1.085        | 20.78                          | 74.71  | 16.84   |

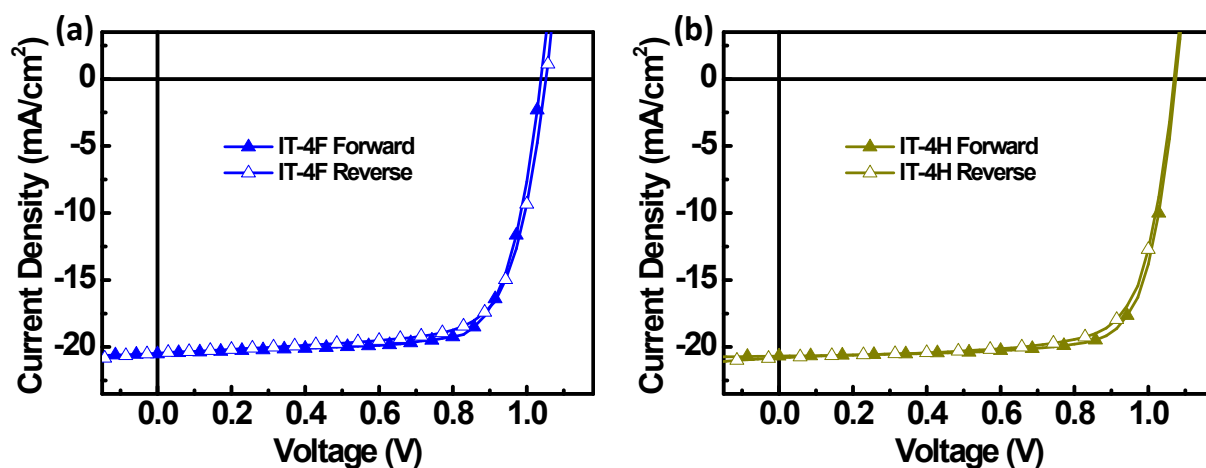

**Fig. S4**  $J$ - $V$  curves of PVSCs based on IT-4F and IT-4H ETLs measured under forward- and reverse-scan directions.

**Table S2.** Photovoltaic parameters of PVSCs with various ETLs measured under forward- and reverse-scan direction.

| Interlayer | Scan direction | $V_{oc}$ (V) | $J_{sc}$ (mA/cm <sup>2</sup> ) | FF (%) | PCE (%) | $R_s$ ( $\Omega \cdot \text{cm}^2$ ) |
|------------|----------------|--------------|--------------------------------|--------|---------|--------------------------------------|
| w/o        | Forward        | 1.022        | 11.71                          | 38.82  | 4.64    | 43.34                                |
|            | Reverse        | 1.021        | 10.70                          | 27.63  | 3.02    | 45.10                                |
| PCBM       | Forward        | 1.088        | 21.09                          | 76.68  | 17.60   | 3.96                                 |
|            | Reverse        | 1.087        | 21.16                          | 73.92  | 17.01   | 3.83                                 |
| IT-4F      | Forward        | 1.037        | 20.49                          | 75.03  | 15.94   | 4.62                                 |
|            | Reverse        | 1.045        | 20.55                          | 71.97  | 15.43   | 5.57                                 |
| IT-4H      | Forward        | 1.072        | 20.68                          | 76.83  | 17.04   | 3.83                                 |
|            | Reverse        | 1.070        | 20.86                          | 73.86  | 16.48   | 3.87                                 |
| IT-4M      | Forward        | 1.083        | 21.19                          | 76.86  | 17.65   | 4.47                                 |
|            | Reverse        | 1.084        | 21.29                          | 74.16  | 17.12   | 4.68                                 |

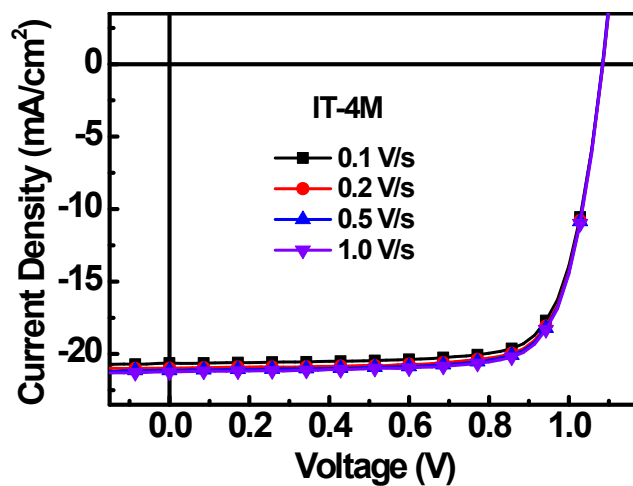

**Fig. S5**  $J$ - $V$  curves of inverted PVSCs using IT-4M ETL scanning at different scan speed from 0.1 to 1.0 V/s.

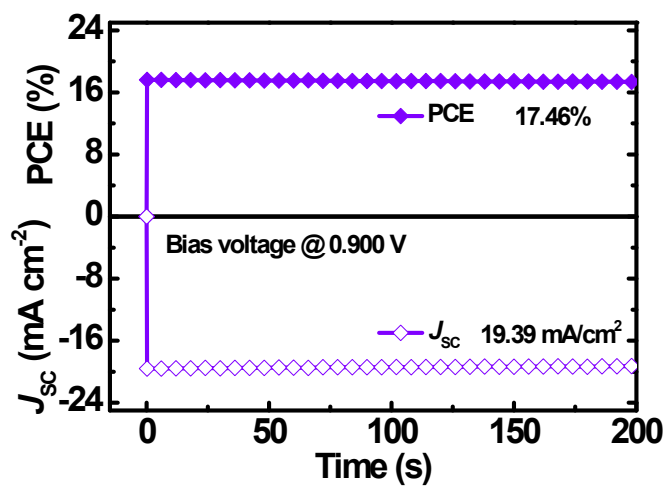

**Fig. S6** Stabilized photocurrent density and PCE output of inverted PVSCs based on IT-4M ETL.

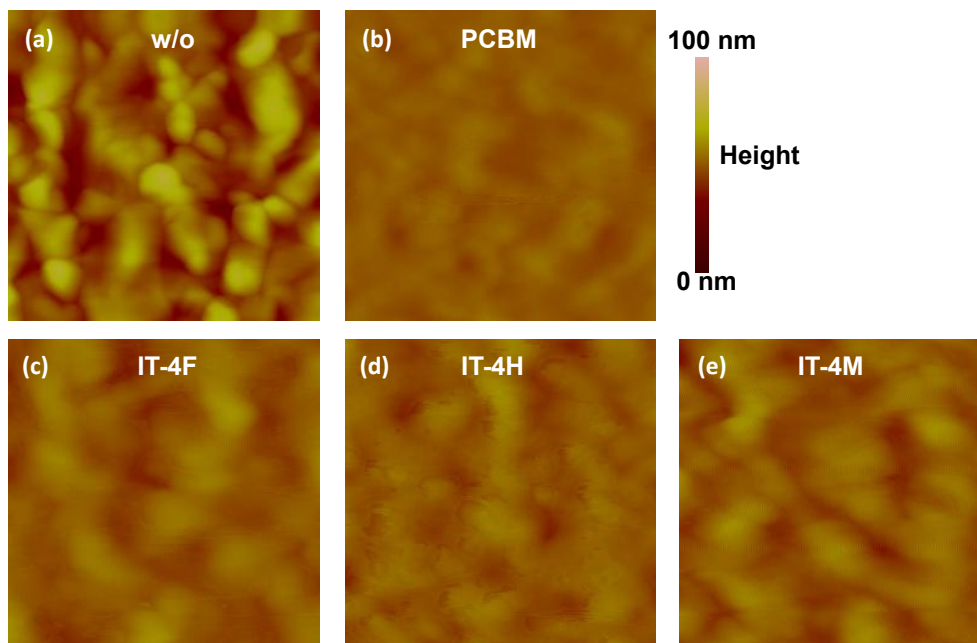

**Fig. S7** AFM topography images ( $2\ \mu\text{m} \times 2\ \mu\text{m}$ ) of the perovskite films covered with different ETLs. (a) w/o, (b) PCBM, (c) IT-4F, (d) IT-4H, and (e) IT-4M.



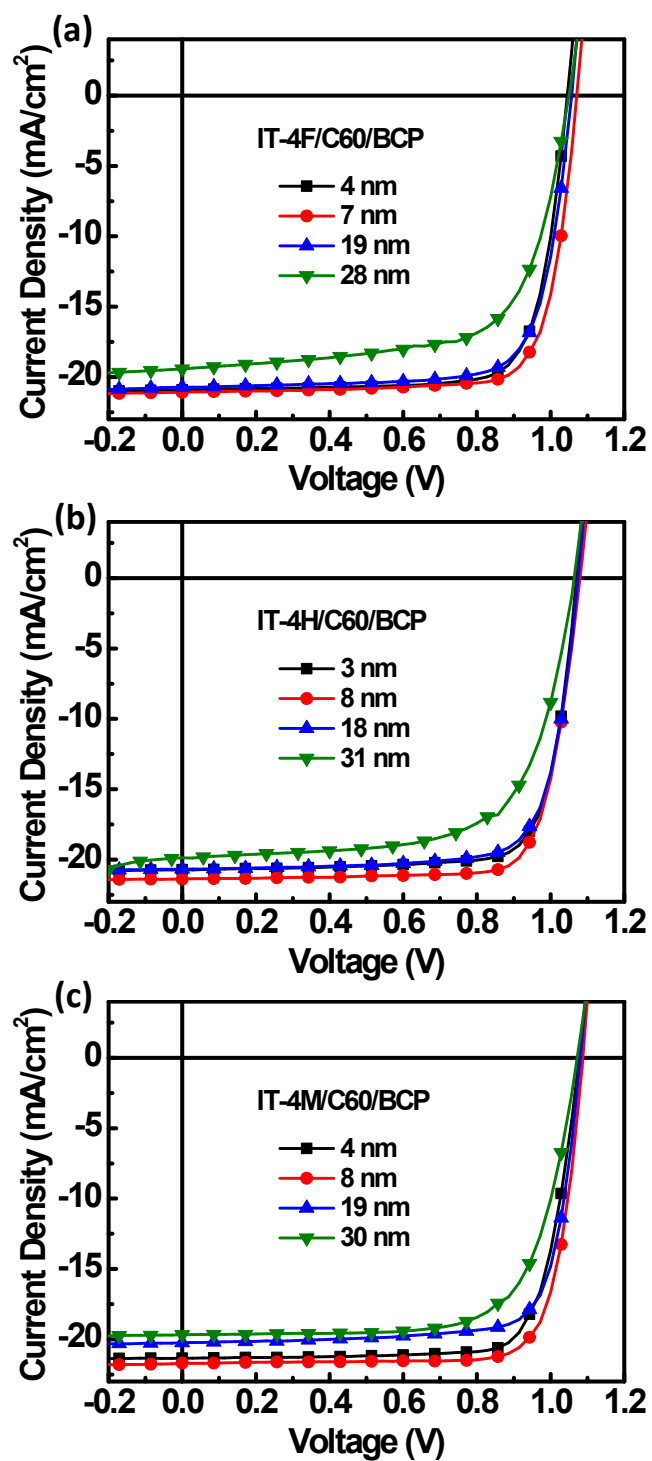

**Fig. S8**  $J$ - $V$  curves of PVSCs (ITO/P3CT-N/Perovskite/various interlayer/C60/BCP/Ag) based on various interlayers (IT-4F, IT-4H and IT-4M) in different thicknesses.

**Table S3.** Summary of the photovoltaic performances of PVSCs (ITO/P3CT-N/Perovskite/various interlayer/C60/BCP/Ag) based on various interlayers (IT-4F, IT-4H and IT-4M) in different thicknesses.

| Interlayer | Thickness (nm) | $V_{OC}$ (V) | $J_{SC}$ (mA/cm <sup>2</sup> ) | FF (%) | PCE (%) |
|------------|----------------|--------------|--------------------------------|--------|---------|
| IT-4F      | 4              | 1.043        | 20.91                          | 77.77  | 16.97   |
|            | 7              | 1.069        | 21.08                          | 78.29  | 17.64   |
|            | 19             | 1.055        | 20.74                          | 76.28  | 16.69   |
|            | 28             | 1.048        | 19.39                          | 67.05  | 13.63   |
| IT-4H      | 3              | 1.068        | 20.72                          | 78.43  | 17.35   |
|            | 8              | 1.079        | 21.37                          | 78.89  | 18.19   |
|            | 18             | 1.072        | 20.68                          | 76.83  | 17.04   |
|            | 31             | 1.064        | 19.99                          | 67.17  | 14.28   |
| IT-4M      | 4              | 1.076        | 21.34                          | 78.14  | 17.95   |
|            | 8              | 1.086        | 21.84                          | 79.75  | 18.92   |
|            | 19             | 1.079        | 20.24                          | 77.76  | 16.98   |
|            | 30             | 1.071        | 19.68                          | 71.30  | 15.03   |

**Table S4.** Summary of the photovoltaic parameters of inverted PVSCs (ITO/P3CT-N/Perovskite/various interlayer/C60/BCP/Ag) with different interlayers (w/o, PCBM, IT-4F, IT-4H and IT-4M).<sup>a</sup>

| Device        | $V_{OC}$ (V) | $J_{SC}$ (mA/cm <sup>2</sup> ) | FF (%) | PCE (%)                         | $R_S$ ( $\Omega \cdot \text{cm}^2$ ) |
|---------------|--------------|--------------------------------|--------|---------------------------------|--------------------------------------|
| C60/BCP       | 1.036        | 20.63                          | 76.29  | 16.31 (15.86±0.51) <sup>a</sup> | 4.6                                  |
| PCBM/C60/BCP  | 1.088        | 21.81                          | 79.37  | 18.84 (18.35±0.44)              | 3.8                                  |
| IT-4F/C60/BCP | 1.069        | 21.08                          | 78.29  | 17.64 (17.15±0.47) <sup>a</sup> | 3.6                                  |
| IT-4H/C60/BCP | 1.079        | 21.37                          | 78.89  | 18.19 (17.68±0.49) <sup>a</sup> | 4.1                                  |
| IT-4M/C60/BCP | 1.086        | 21.84                          | 79.75  | 18.92 (18.44±0.46) <sup>a</sup> | 3.3                                  |

<sup>a</sup> The data in parentheses denote the average values based on 20 devices.
